# Supplementary material for: COVID-19 Risk Perception and Adherence to Preventive Measures among Medical Students after Receiving COVID-19 Vaccination: A Multicenter Cross-Sectional Study in Egypt
Source: MDPI journal article supplement (doi:10.3390/vaccines11010007), 2022-12-20
Supplement: s1 [file s1]

## The questionnaire

### **COVID-19 risk perception and adherence to preventive measures following vaccination among medical students: A cross-sectional study in Egypt**

:Hello

You are invited to participate in our survey regarding Covid-19. In this survey, medical students will be asked to complete a survey that asks questions about risk perception and adherence to preventive measures. It will take approximately 3 minutes to complete the questionnaire

.Completing this questionnaire means you agree to participate in this study

Your participation in this study is completely voluntary. There are no foreseeable risks associated with this project. However, if you feel uncomfortable answering any questions, you can withdraw from the survey at any point

Your survey response will be strictly confidential and data from this research will be reported only in the aggregate. Your information will be coded and will remain confidential

If you have questions at any time about the survey or the procedures, you may contact **Hamad** by email [abdullah.hamad744@gmail.com](mailto:abdullah.hamad744@gmail.com) Thank you very much for your time and support

.Please start with the survey now by clicking on the **START** button below

### **Socio-demographic section**

University

1. Cairo
2. Ain Shams
3. Alex
4. Mansoura
5. Helwan
6. Assiut
7. South valley
8. Menia
9. Sohag
10. Beni Suef
11. Zagazig
12. Tanta
13. Menoufia
14. Benha
15. Kafr El Sheikh
16. Fayoum
17. Suez canal
18. Port Said

Academic year

1. 1st
2. 2nd
3. 3rd
4. 4th
5. 5th
6. 6th
7. Internship

Sex

1. Male
2. Female

:Age

Residence

1. Big City
2. Urban center
3. Rural center
4. Village

Family income/economic level

1. Enough and save
2. Just enough
3. not enough
4. not enough and in debts

Vaccination status

1. not vaccinated at all
2. Partially vaccinated (one dose)
3. Full vaccination without booster (two doses)
4. Full Vaccination with booster (three doses)

:Health status

|                                   | yes                      | no                       |
|-----------------------------------|--------------------------|--------------------------|
| Get infected with Covid-19 before | <input type="checkbox"/> | <input type="checkbox"/> |
| Have any chronic disease          | <input type="checkbox"/> | <input type="checkbox"/> |

smoking status

- .1 Smoker
- .2 Ex-smoker
- .3 Never smoked

## :Risk perception section

### .Perception of seriousness and susceptibility

|                                                                                                                                                     | Strongly agree           | Slightly agree           | Neutral                  | Slightly disagree        | Strongly disagree        |
|-----------------------------------------------------------------------------------------------------------------------------------------------------|--------------------------|--------------------------|--------------------------|--------------------------|--------------------------|
| On the individual level, COVID-19 infection is serious<br>( Serious: complicated and affect your life )                                             | <input type="checkbox"/> |
| On the community level, COVID-19 infection is serious<br>(Serious: Affect many people and restrict normal flow of social life )                     | <input type="checkbox"/> |
| .You have a big chance of getting COVID-19 infection in the coming year                                                                             | <input type="checkbox"/> |
| After vaccination, you can get COVID-19 infection if you don't follow preventive measures                                                           | <input type="checkbox"/> |
| in case you have not been vaccinated against COVID-19 or the vaccine was not available, you would be at higher risk of infection in the coming year | <input type="checkbox"/> |
| Currently you are concerned about COVID-19                                                                                                          | <input type="checkbox"/> |

### .Perception of efficacy and self-efficacy

?Do you think that the following measurements help to prevent COVID-19 infection

|                        | Certainly yes            | Probably yes             | Perhaps yes-<br>perhaps no | Probably not             | Certainly not            |
|------------------------|--------------------------|--------------------------|----------------------------|--------------------------|--------------------------|
| ?Frequent hand hygiene | <input type="checkbox"/> | <input type="checkbox"/> | <input type="checkbox"/>   | <input type="checkbox"/> | <input type="checkbox"/> |
| ?Wearing masks         | <input type="checkbox"/> | <input type="checkbox"/> | <input type="checkbox"/>   | <input type="checkbox"/> | <input type="checkbox"/> |
| ?social distancing     | <input type="checkbox"/> | <input type="checkbox"/> | <input type="checkbox"/>   | <input type="checkbox"/> | <input type="checkbox"/> |
| ?Quarantine            | <input type="checkbox"/> | <input type="checkbox"/> | <input type="checkbox"/>   | <input type="checkbox"/> | <input type="checkbox"/> |

### Intention to carry out the measures

?Do you think that you can apply the following measurement if this is advised

|                   | Certainly yes            | Probably yes             | Perhaps yes-<br>perhaps no | Probably not             | Certainly not            |
|-------------------|--------------------------|--------------------------|----------------------------|--------------------------|--------------------------|
| Hand hygiene      | <input type="checkbox"/> | <input type="checkbox"/> | <input type="checkbox"/>   | <input type="checkbox"/> | <input type="checkbox"/> |
| Wearing mask      | <input type="checkbox"/> | <input type="checkbox"/> | <input type="checkbox"/>   | <input type="checkbox"/> | <input type="checkbox"/> |
| social distancing | <input type="checkbox"/> | <input type="checkbox"/> | <input type="checkbox"/>   | <input type="checkbox"/> | <input type="checkbox"/> |
| quarantine        | <input type="checkbox"/> | <input type="checkbox"/> | <input type="checkbox"/>   | <input type="checkbox"/> | <input type="checkbox"/> |

## Adherence to preventive measures section

:Please choose what accurately describes your behavior now

**After vaccination**

|                                                                                                                  | Always                   | Often                    | Sometimes                | Seldom                   | Never                    |
|------------------------------------------------------------------------------------------------------------------|--------------------------|--------------------------|--------------------------|--------------------------|--------------------------|
| Currently, Do you keep a safe distance from<br>?others when going out                                            | <input type="checkbox"/> |
| Currently, do you avoid shaking hands with<br>?others                                                            | <input type="checkbox"/> |
| Currently, do you avoid hugging and kissing<br>?cheeks                                                           | <input type="checkbox"/> |
| Currently, do you wear a well-fitting mask<br>?when going out                                                    | <input type="checkbox"/> |
| Currently, do you wash your hands frequently<br>?with soap for 20 sec                                            | <input type="checkbox"/> |
| ?Currently, do you use antiseptics                                                                               | <input type="checkbox"/> |
| Currently, do you avoid crowds such as malls<br>?and markets                                                     | <input type="checkbox"/> |
| Currently, do you avoid social meetings with<br>?relatives and friends                                           | <input type="checkbox"/> |
| Currently, do you avoid social events like<br>?marriage or parties                                               | <input type="checkbox"/> |
| Currently, do you cover any cough or sneeze in<br>?your bent elbow                                               | <input type="checkbox"/> |
| Currently, do you stay at home when feeling<br>?flu-like symptoms                                                | <input type="checkbox"/> |
| Currently, do you eat healthy food, get enough<br>?sleep and Exercise regularly                                  | <input type="checkbox"/> |
| Currently, if you get in contact with covid-19<br>infected patients would you isolate yourself at<br>?home       | <input type="checkbox"/> |
| Currently, do you ensure good ventilation, such<br>as by opening a window, when you are indoors<br>? with others | <input type="checkbox"/> |
